# Supplementary material for: Cardiac natriuretic peptides for diagnosis of covert atrial fibrillation after acute ischaemic stroke: a meta-analysis of diagnostic accuracy studies
Source: PubMed Central journal article supplement — Stroke Vasc Neurol. 2020 Oct 1;6(1):128–32. doi: 10.1136/svn-2020-000440 (PMC8005900; doi:10.1136/svn-2020-000440), 2020-10-01
Supplement: svn-2020-000440supp001.pdf [file svn-2020-000440supp001.pdf]

**SUPPLEMENTAL MATERIAL****Cardiac natriuretic peptides for diagnosis of covert atrial fibrillation after acute****ischemic stroke: a meta-analysis of diagnostic accuracy studies**

## Contents

|                                                                                                                                                                |   |
|----------------------------------------------------------------------------------------------------------------------------------------------------------------|---|
| <b>Table I: Search strategy</b> .....                                                                                                                          | 2 |
| <b>Table II: Characteristics of the included studies</b> .....                                                                                                 | 3 |
| <b>Figure I: Study selection</b> .....                                                                                                                         | 5 |
| <b>Figure II: Risk of bias and applicability concerns graph</b> .....                                                                                          | 5 |
| <b>Figure III: Risk of bias and applicability concerns summary</b> .....                                                                                       | 6 |
| <b>Figure IV: Hierarchical summary receiver operating characteristic curve for the diagnosis of new onset atrial fibrillation using BNP or NT-proBNP</b> ..... | 7 |
| <b>Figure V: Deeks' funnel plot asymmetry tests for the diagnosis of new onset atrial fibrillation with BNP or NT-proBNP</b> .....                             | 8 |

**Table I: Search strategy**

| Database | Strategy                                                                                                                                                                                                                                                                                        | results |
|----------|-------------------------------------------------------------------------------------------------------------------------------------------------------------------------------------------------------------------------------------------------------------------------------------------------|---------|
| Pubmed   | #1: (((("Stroke"[Mesh]) OR (Cerebrovascular Accident)) OR (Brain Vascular Accident)) OR (CVA)) OR (Apoplexy)                                                                                                                                                                                    | 331     |
|          | #2: (((("Natriuretic Peptide, Brain"[Mesh]) OR (Brain Natriuretic Peptide)) OR (Natriuretic Factor 32)) OR (Type-B Natriuretic Peptide)) OR (Nesiritide)) OR (Natreacor)                                                                                                                        |         |
|          | #3:((((((((("pro-brain natriuretic peptide (1-76)" [Supplementary Concept])) OR (NT-proBNP)) OR (N-terminal pro-BNP)) OR (proBNP(1-76))) OR (NTproBNP)) OR (N-BNP peptide)) OR (NT-BNP)) ) OR (Amino-terminal pro-brain natriuretic peptide)) OR (aminoterminal pro-B-type natriuretic peptide) |         |
|          | #4: ("Atrial Fibrillation"[Mesh]) OR (Auricular Fibrillation)                                                                                                                                                                                                                                   |         |
|          | #5 : (#2) OR (#3)                                                                                                                                                                                                                                                                               |         |
|          | #6: ((#1) AND (#4)) AND (#5)                                                                                                                                                                                                                                                                    |         |
| EMBASE   | #1: stroke or Cerebrovascular Accident or CVA or Brain Vascular Accident or Apoplexy                                                                                                                                                                                                            | 907     |
|          | #2: BNP or Brain Natriuretic Peptide or Natriuretic Factor 32 or Type-B Natriuretic Peptide or Nesiritide or Natreacor                                                                                                                                                                          |         |
|          | #3: NT-proBNP or N-terminal pro-BNP or proBNP 76 or NTproBNP or N-BNP peptide or NT-BNP or Amino-terminal pro-brain natriuretic peptide or aminoterminal pro-B-type natriuretic peptide                                                                                                         |         |
|          | #4: Atrial Fibrillation or Auricular Fibrillation                                                                                                                                                                                                                                               |         |
|          | #5 : #2 or #3                                                                                                                                                                                                                                                                                   |         |
|          | #6: #1 and #4 and #5                                                                                                                                                                                                                                                                            |         |

BNP for diagnosis of covert atrial fibrillation

**Table II: Characteristics of the included studies**

| PMID      | Author             | Year | Sample size | Age, years (mean) | Men % | Stroke onset | HTN % | DM % | DLP % | Smoking | NIHSS (mean) | AD (cm) | HF % | VD % | TTD, hours | AF % | Method AF diagnosis                         | BM        | Cut-off (pg/mL) | Blood sampling | Method biomarker measurement |
|-----------|--------------------|------|-------------|-------------------|-------|--------------|-------|------|-------|---------|--------------|---------|------|------|------------|------|---------------------------------------------|-----------|-----------------|----------------|------------------------------|
| 31813354  | Wasser[1]          | 2019 | 373         | 73                | 60    | na           | 80    | 30   | 42    | 18      | 3            | 4.1     | 5    | na   | 36         | 34   | EPM or standard of care                     | BNP       | 100             | randomisation  | CLIA                         |
| 21094497  | Okada[2]           | 2010 | 165         | 72                | 62    | <24h         | 60    | 30   | 26    | 48      | 7            | na      | 9    | na   | 7.3        | 13   | 12-lead ECG, 24h-Holter ECG, Continuous ECG | BNP       | 85              | admission      | CLIA                         |
| 22341921  | Shibazaki[3]       | 2012 | 584         | 72                | 64    | <24h         | 70    | 30   | 28    | 51      | 4.7          | na      | 0.3  | na   | 3          | 40   | 12-lead ECG, 24h-Holter ECG, Continuous ECG | BNP       | 65              | admission      | CLIA                         |
| 23010631  | Suissa[4]          | 2013 | 300         | 63                | 63    | na           | 50    | 10   | 29    | 41      | 7.1          | na      | 2    | 17   | 6.8        | 52   | 24h-Holter ECG                              | BNP       | 131             | admission      | CLIA                         |
| 23803318  | Rodríguez-Yáñez[5] | 2013 | 264         | 73                | 56    | <24h         | 50    | 30   | 30    | 21      | 7            | na      | na   | na   | na         | 15   | 12-lead ECG and 24h-Holter ECG              | NT-proBNP | 360             | admission      | ECLIA                        |
| 23981586* | Fonseca[6]         | 2014 | 80          | 69                | 69    | <72h         | 70    | 30   | 33    | 9       | 8.3          | na      | na   | na   | na         | 17   | 12-lead ECG and 24h-Holter ECG              | NT-proBNP | 265.5           | admission      | ECLIA                        |
| 23981586* | Fonseca            | 2014 | 184         | 62                | 57    | <72h         | 70    | 30   | 45    | 23      | 6.7          | na      | na   | na   | na         | 55   | 12-lead ECG and 24h-Holter ECG              | NT-proBNP | 265.5           | admission      | ECLIA                        |

BNP for diagnosis of covert atrial fibrillation

|          |             |      |     |    |    |        |    |    |    |    |     |     |    |    |    |    |                                             |           |     |           |       |
|----------|-------------|------|-----|----|----|--------|----|----|----|----|-----|-----|----|----|----|----|---------------------------------------------|-----------|-----|-----------|-------|
| 26190307 | Yoshioka[7] | 2015 | 288 | 74 | 61 | <7days | 80 | 30 | 52 | 15 | na  | 3.6 | 2  | 32 | 3  | 45 | 12-lead ECG, 24h-Holter ECG, Continuous ECG | BNP       | 90  | admission | CLIA  |
| 25916280 | Sanak[8]    | 2015 | 95  | 41 | 52 | <12h   | 10 | 0  | 14 | 24 | 9   | 3.5 | na | na | na | 9  | 3-week ECG monitoring                       | NT-proBNP | 125 | admission | ECLIA |
| 22509292 | Wachter[9]  | 2012 | 220 | 68 | 58 | <24h   | 70 | 20 | 34 | 25 | 3.5 | 4.1 | 5  | na | na | 28 | 12-lead ECG and 7-day Holter ECG            | BNP       | 118 | admission | CLIA  |

\* This study included two cohorts of patients: 184 patients with acute ischemic stroke of known etiology and 80 patients with cryptogenic stroke. Because we did not have access to individual patient data, there was a non-negligible risk of introducing bias by merging data from the two cohorts.

AD indicates atrial diameter ; AF, atrial fibrillation; BM, biomarker ; BNP, B-type natriuretic peptide; CLIA, chemiluminescence immunoassay; DLP, dyslipidemia; DM, diabetes mellitus; ECG, electrocardiogram; ECLIA, electrochemiluminescence immunoassay; HF, heart failure; HTN, hypertension; NIHSS, National Institutes of Health Stroke Scale; NT-proBNP, N-terminal pro-B-type natriuretic peptide; PMID, PubMed accession number; TTD, time to diagnosis of atrial fibrillation; and VD, valvular disease.

BNP for diagnosis of covert atrial fibrillation

**Figure I: Study selection**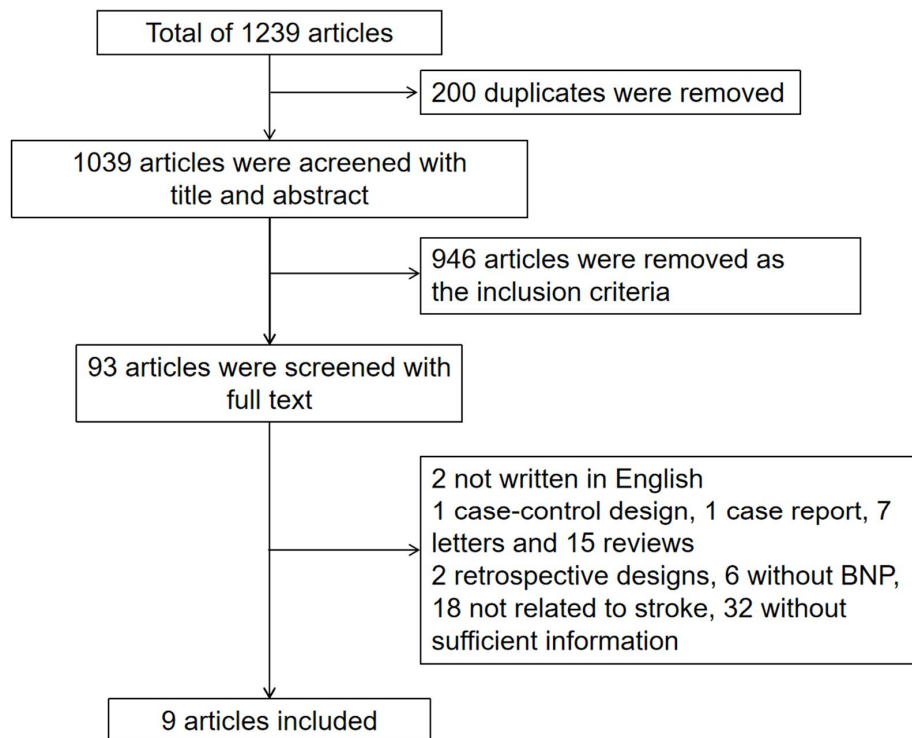**Figure II: Risk of bias and applicability concerns graph**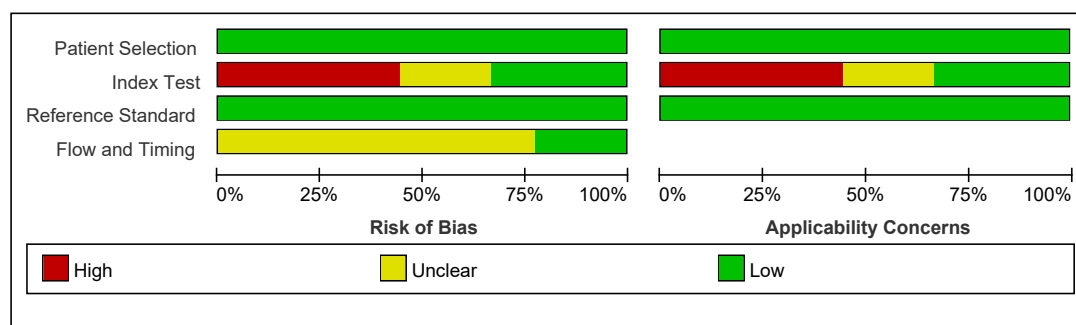

Authors' judgements about each domain are presented as percentages across included studies.

BNP for diagnosis of covert atrial fibrillation

**Figure III: Risk of bias and applicability concerns summary**

|                     | <u>Risk of Bias</u> |            |                    |                 | <u>Applicability Concerns</u> |            |                    |
|---------------------|---------------------|------------|--------------------|-----------------|-------------------------------|------------|--------------------|
|                     | Patient Selection   | Index Test | Reference Standard | Flow and Timing | Patient Selection             | Index Test | Reference Standard |
| Fonseca AC2014      | +                   | +          | +                  | ?               | +                             | +          | +                  |
| Okada Y2010         | +                   | -          | +                  | ?               | +                             | -          | +                  |
| Rodríguez-Yáñez2013 | +                   | +          | +                  | ?               | +                             | +          | +                  |
| Sanak D2015         | +                   | ?          | +                  | ?               | +                             | ?          | +                  |
| Shibazaki K2012     | +                   | -          | +                  | ?               | +                             | -          | +                  |
| Suissa L2013        | +                   | -          | +                  | +               | +                             | -          | +                  |
| Wachter 2012        | +                   | ?          | +                  | +               | +                             | ?          | +                  |
| Wasser K2019        | +                   | +          | +                  | ?               | +                             | +          | +                  |
| Yoshioka, K2015     | +                   | -          | +                  | ?               | +                             | -          | +                  |

 **High**     
  **Unclear**     
  **Low**

Authors' judgements about each domain is presented for each included study.

BNP for diagnosis of covert atrial fibrillation

**Figure IV: Hierarchical summary receiver operating characteristic curve for the diagnosis of new onset atrial fibrillation using BNP or NT-proBNP**

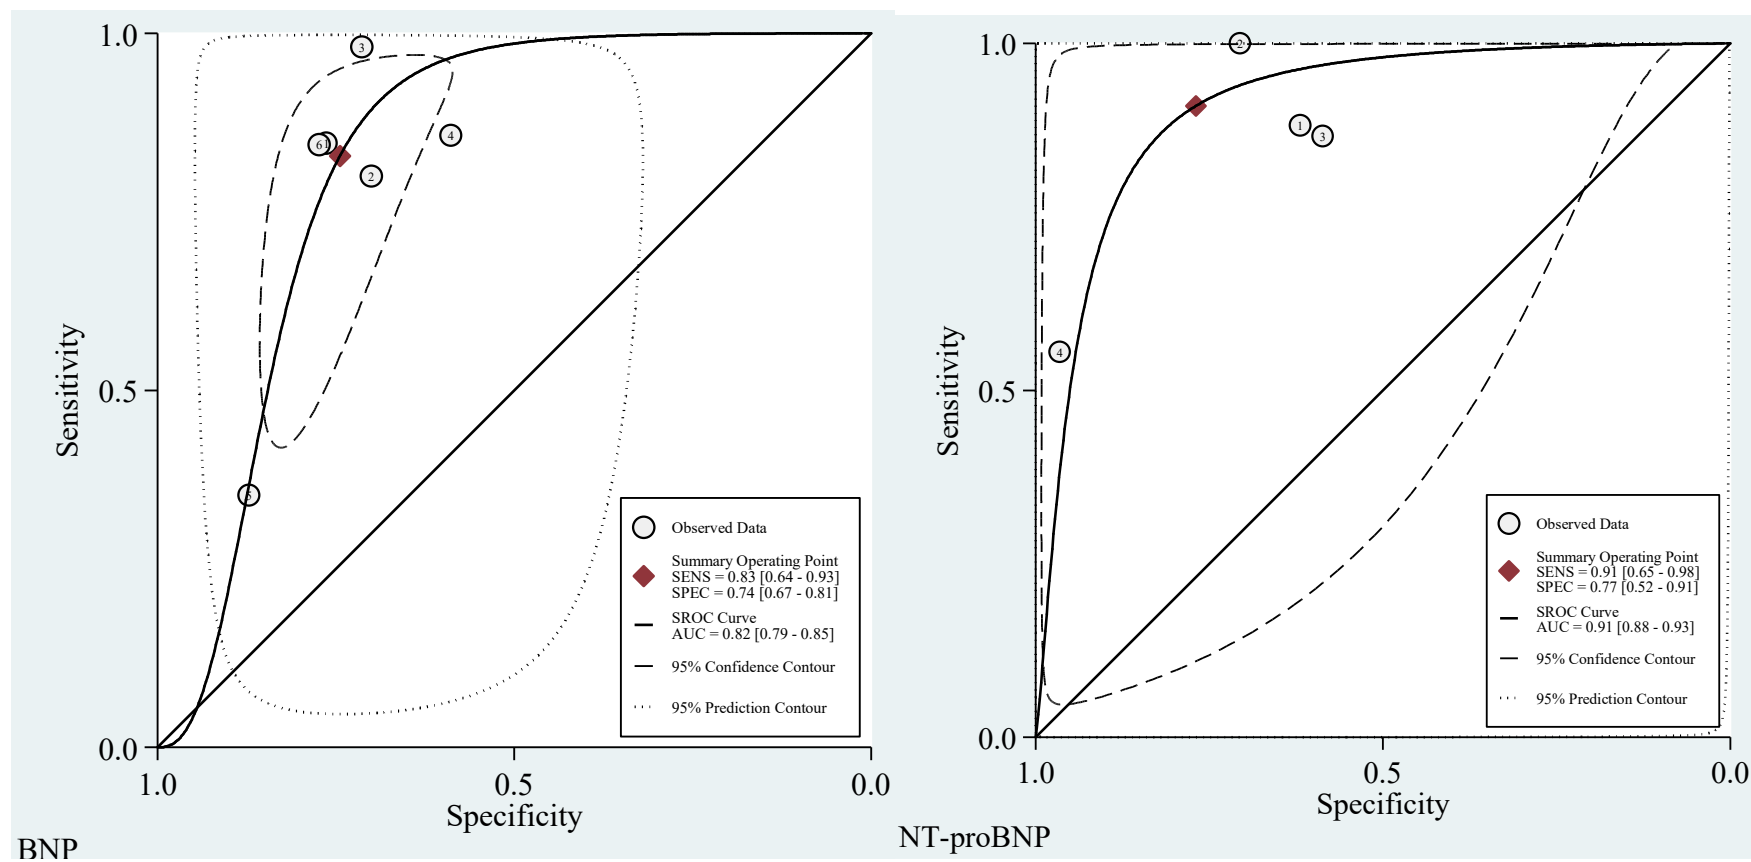

BNP for diagnosis of covert atrial fibrillation

**Figure V: Deeks' funnel plot asymmetry tests for the diagnosis of new onset atrial fibrillation with BNP or NT-proBNP**

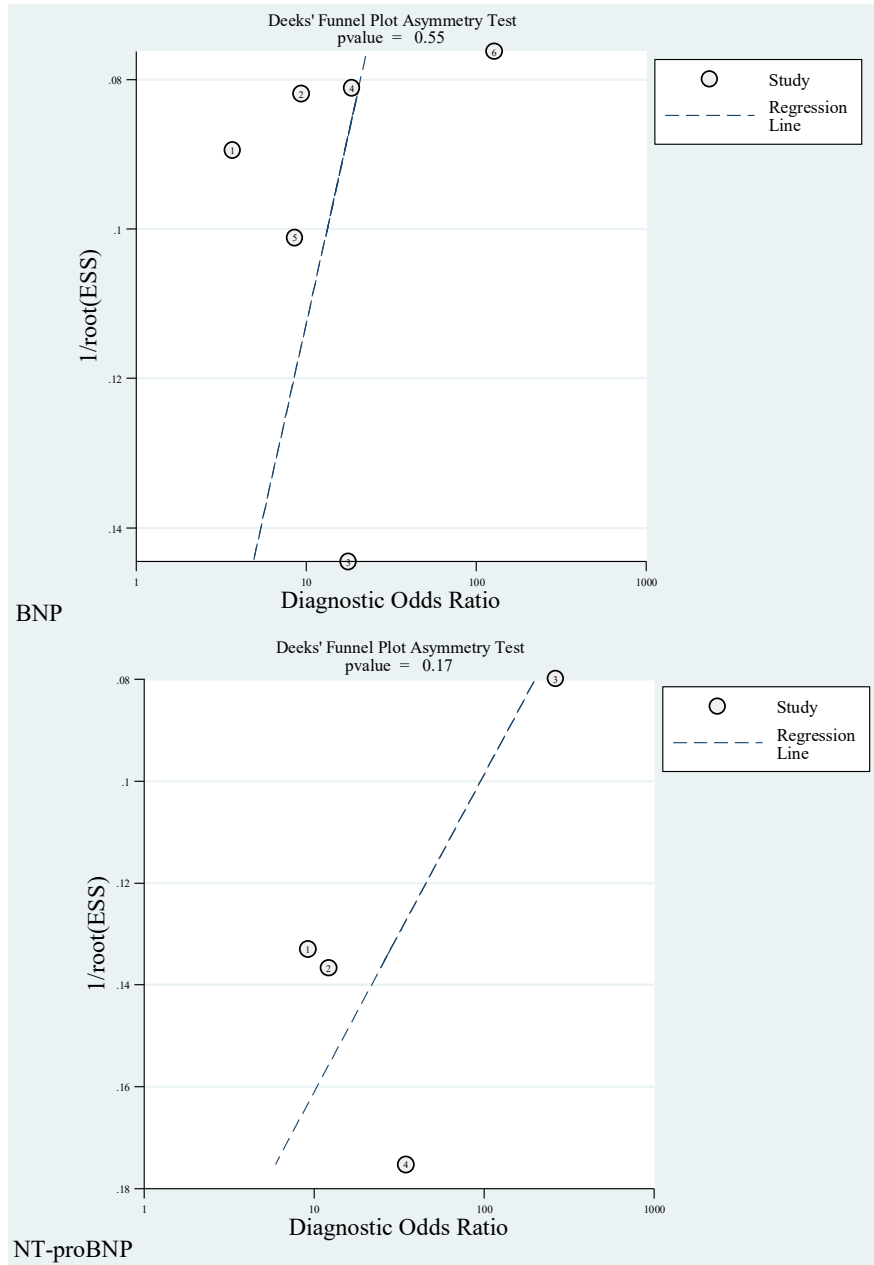

BNP for diagnosis of covert atrial fibrillation
